# Supplementary material for: Binding Site Turnover Produces Pervasive Quantitative Changes in Transcription Factor Binding between Closely Related Drosophila Species
Source: PubMed Central journal article supplement (PMC2843597; doi:10.1371/journal.pbio.1000343), 2010-03-23

Binding divergence of BCD (shuffled)

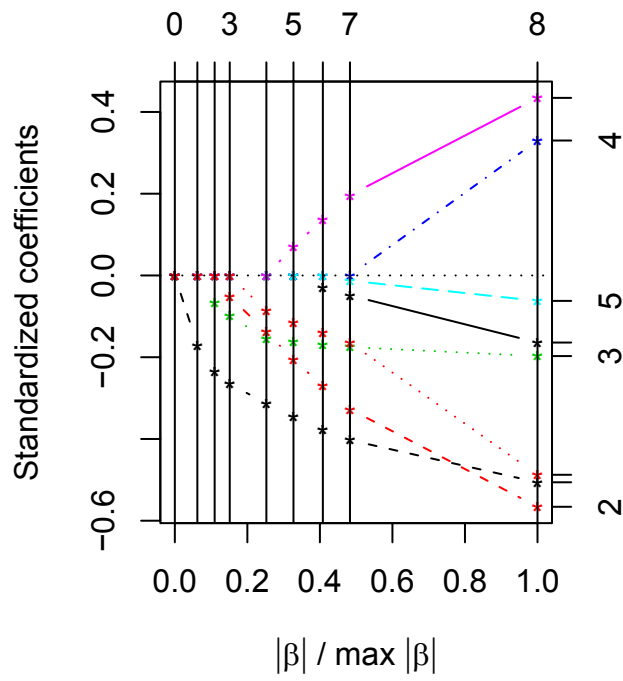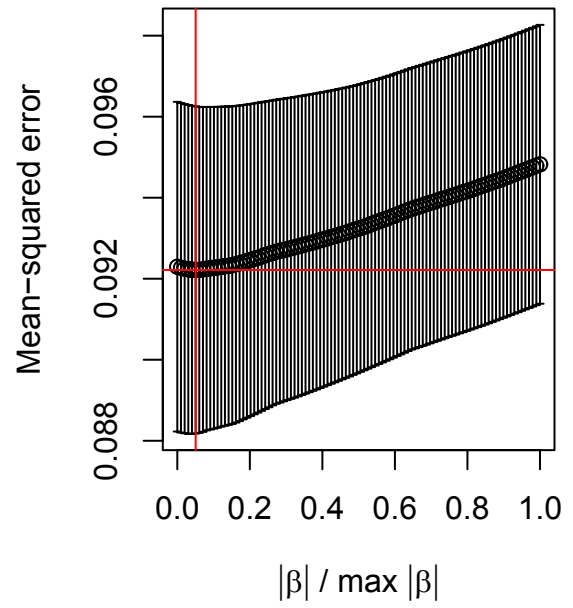

Supplement: pbio.1000343.s020.pdf [file pbio.1000343.s020.pdf]
