# Supplementary material for: Binding Site Turnover Produces Pervasive Quantitative Changes in Transcription Factor Binding between Closely Related Drosophila Species
Source: PubMed Central journal article supplement (PMC2843597; doi:10.1371/journal.pbio.1000343), 2010-03-23

Binding divergence of GT (shuffled)

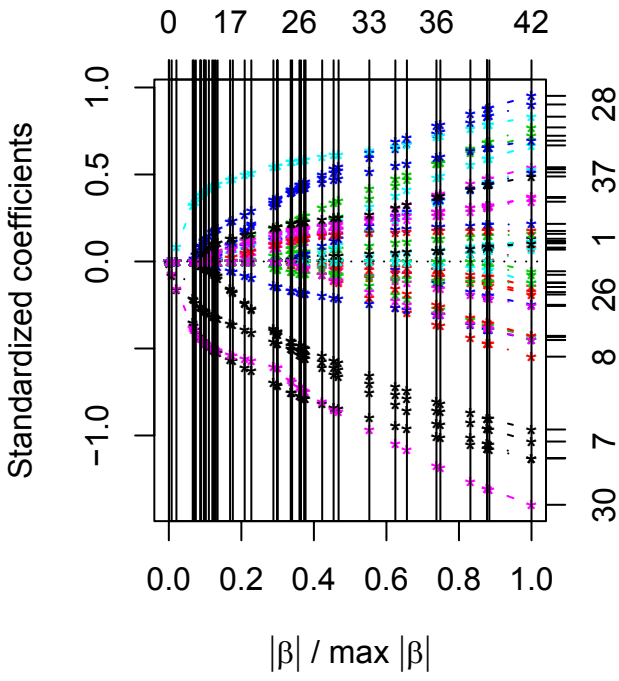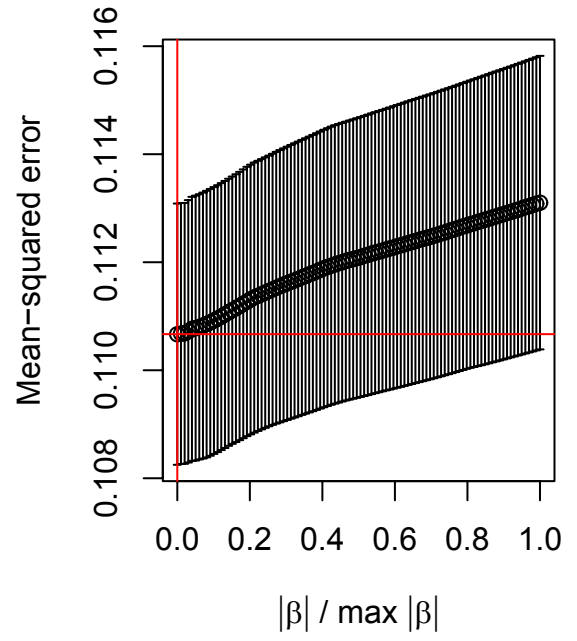

Supplement: pbio.1000343.s026.pdf [file pbio.1000343.s026.pdf]
