# Supplementary material for: Binding Site Turnover Produces Pervasive Quantitative Changes in Transcription Factor Binding between Closely Related Drosophila Species
Source: PubMed Central journal article supplement (PMC2843597; doi:10.1371/journal.pbio.1000343), 2010-03-23

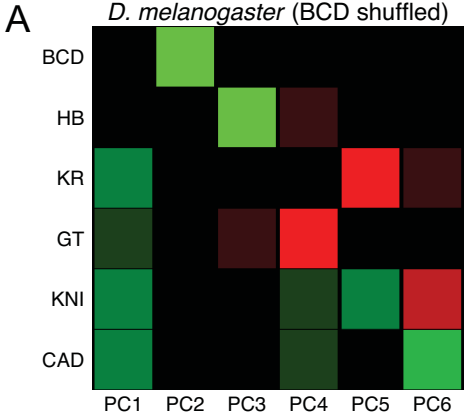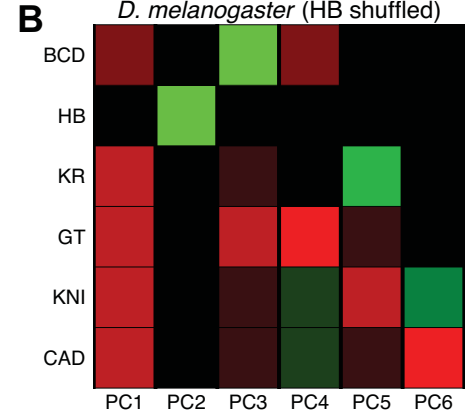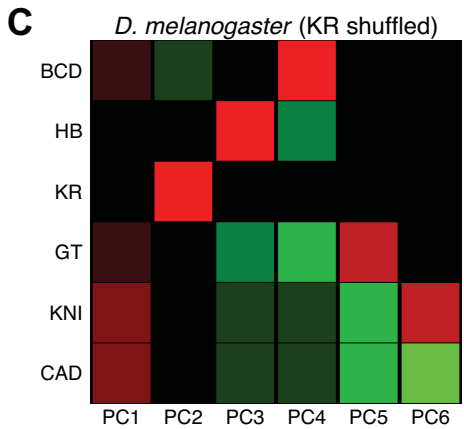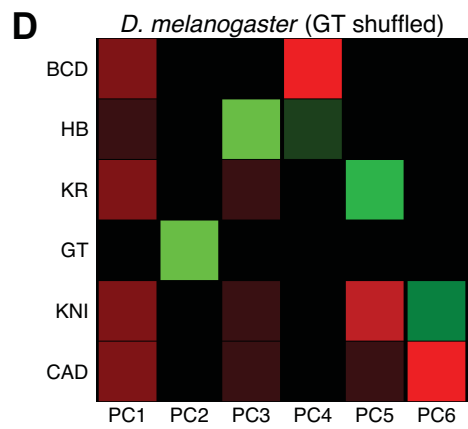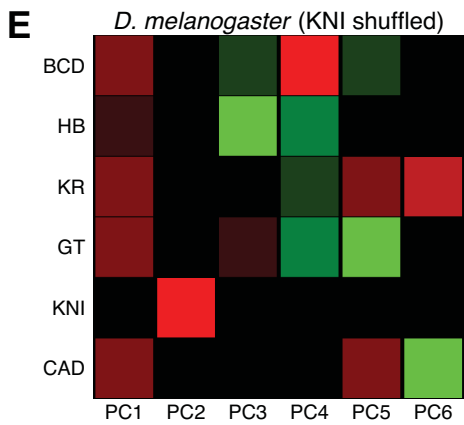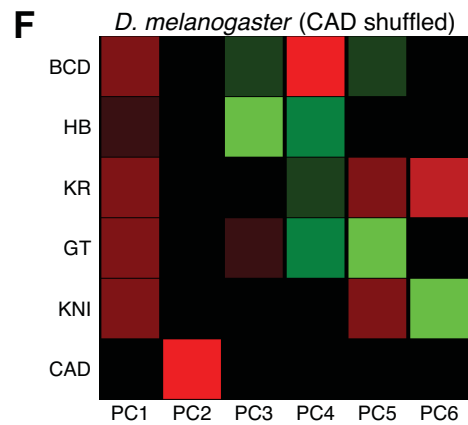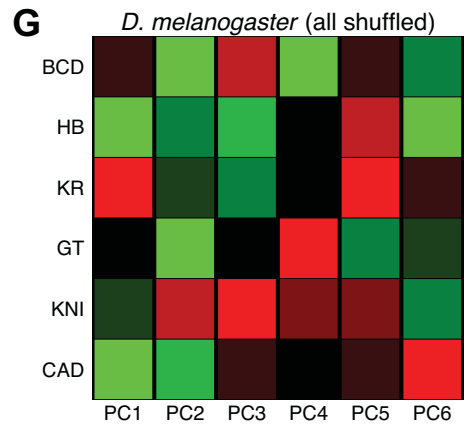

Supplement: pbio.1000343.s034.pdf [file pbio.1000343.s034.pdf]
